# Supplementary material
Source: publisher site journal article supplement (https://www.dovepress.com/article/391001)

TEST DURATION: 6:12  
 FIXATION TARGET: Central  
 FIXATION ERRS: 0/10 (0 %)  
 FALSE POS ERRS: 0/10 (0 %)  
 FALSE NEG ERRS: 2/6 (33 %)\*

# 30-2 FDT Threshold

TEST SPEED: NORMAL

PUPIL DIAMETER:  
 VISUAL ACUITY:  
 RX:

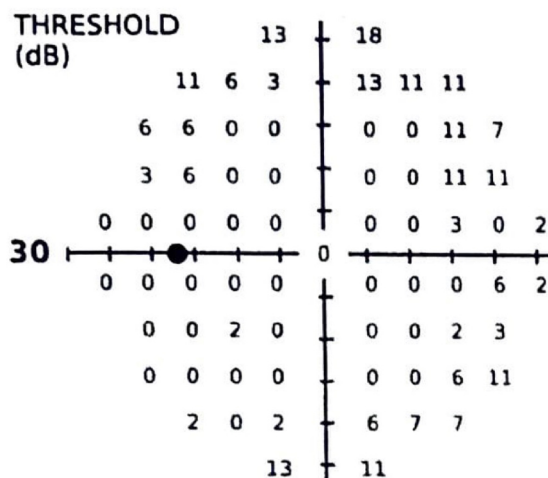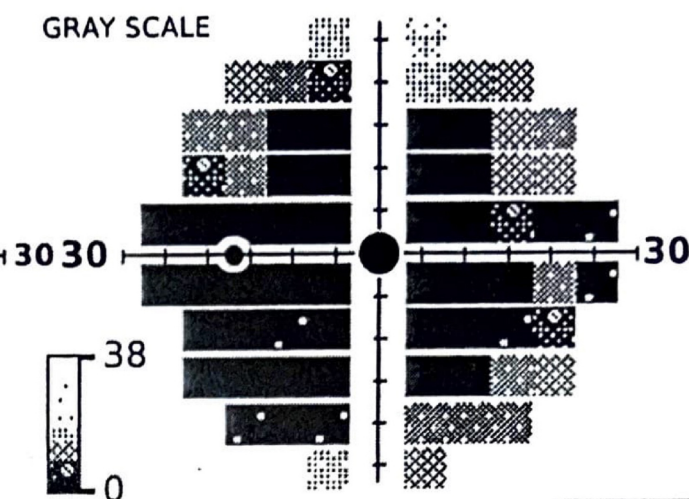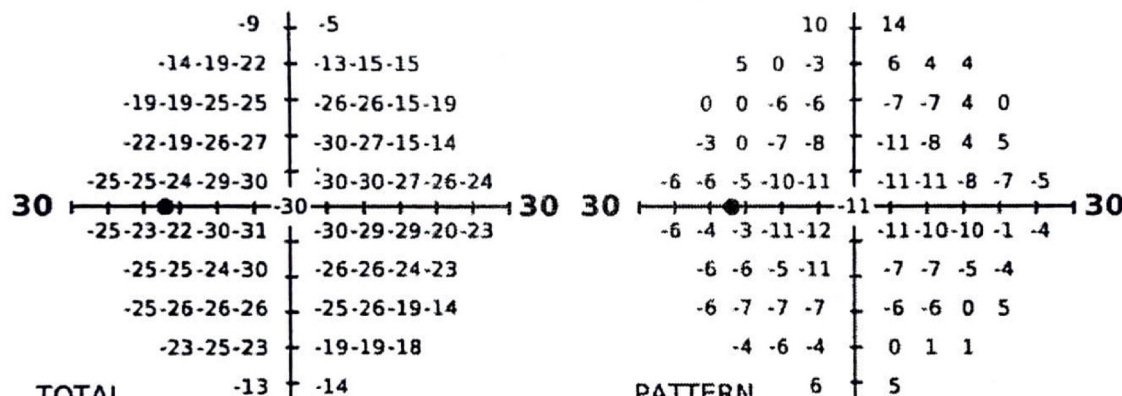

GHT:  
 Outside normal limits  
 MD: -24.56 dB P<0.5%  
 PSD: +4.69 dB P<0.5%

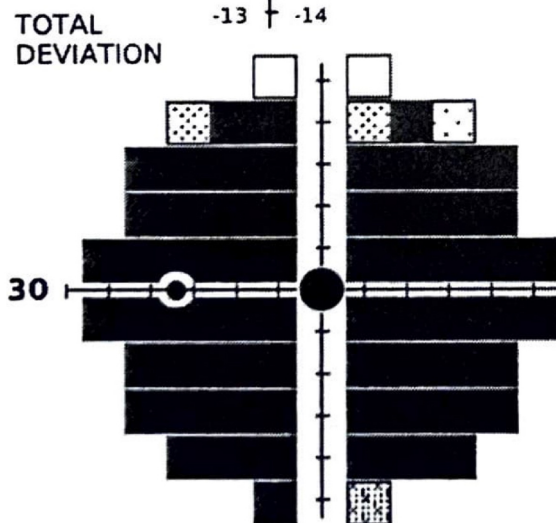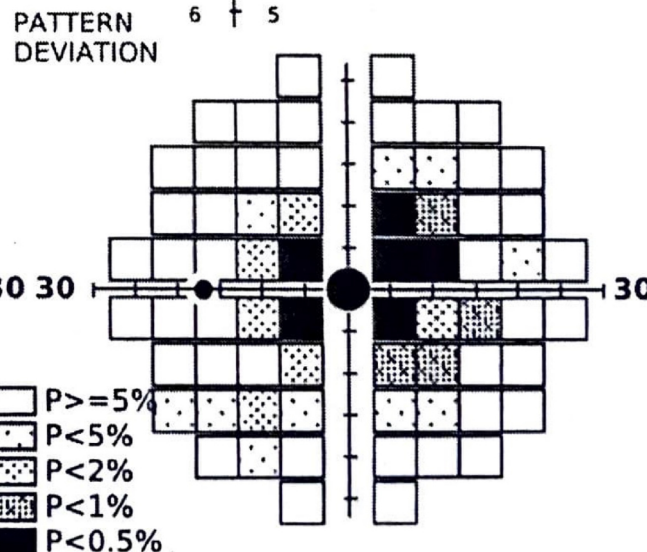

Supplement: Supplementary file 1 [file 09_Nov_2022_ID-391001_Supplemental_Figure_2-_Visual_Field_Left_eye_.pdf › 09_Nov_2022_ID-391001_Supplemental_Figure_2-_Visual_Field_Left_eye_.pdf]
