# Supplementary material
Source: publisher site journal article supplement (https://www.dovepress.com/article/391001)
Supplement: Supplementary file 2 [file 09_Nov_2022_ID-391001_Supplemental_figure_1-_Visual_Field_Right_eye.pdf › 09_Nov_2022_ID-391001_Supplemental_figure_1-_Visual_Field_Right_eye.pdf]

TEST DURATION: 6:07  
 FIXATION TARGET: Central  
 FIXATION ERRS: 0/10 (0 %)  
 FALSE POS ERRS: 0/10 (0 %)  
 FALSE NEG ERRS: 2/6 (33 %)\*

# 30-2 FDT Threshold

TEST SPEED: NORMAL

PUPIL DIAMETER:  
 VISUAL ACUITY:  
 RX:

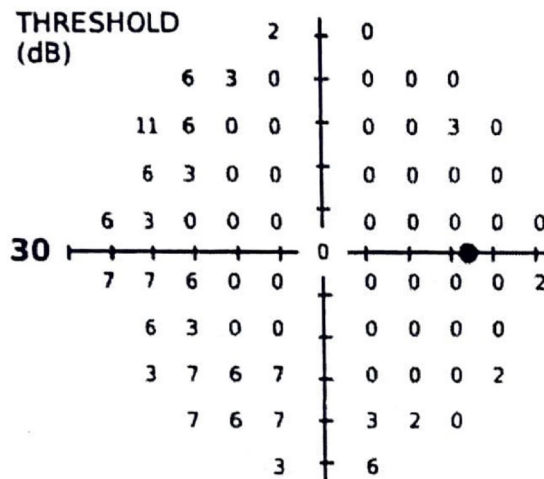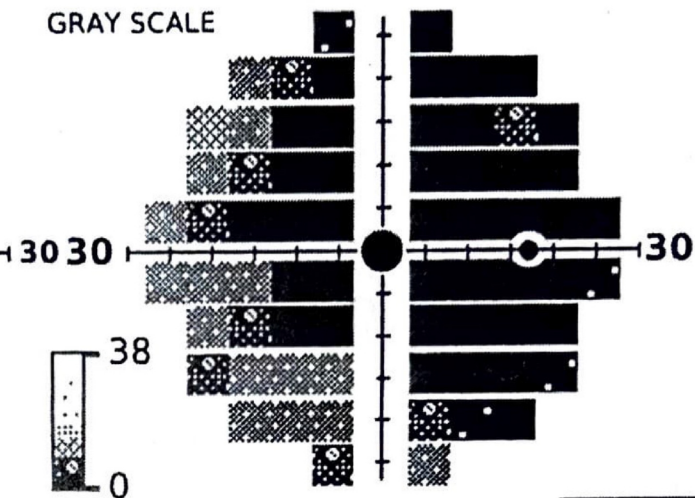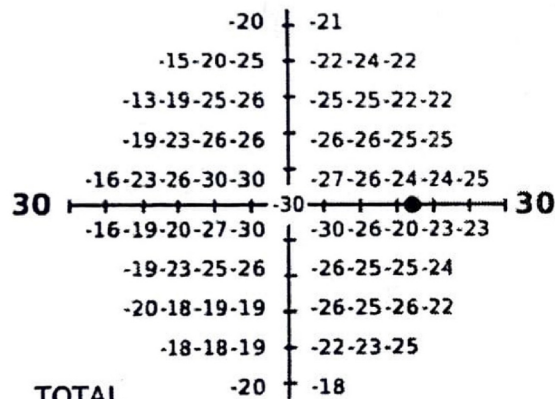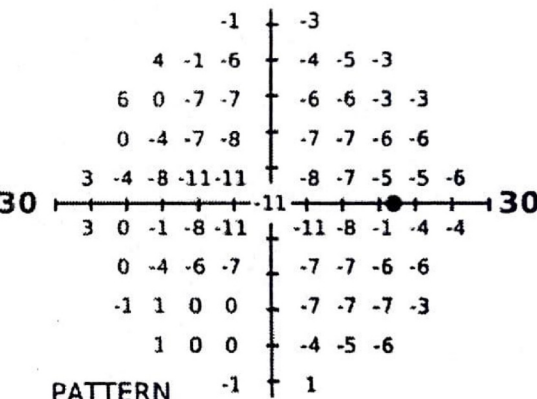

GHT:  
 Outside normal limits  
 MD: -23.75 dB P<0.5%  
 PSD: +3.69 dB

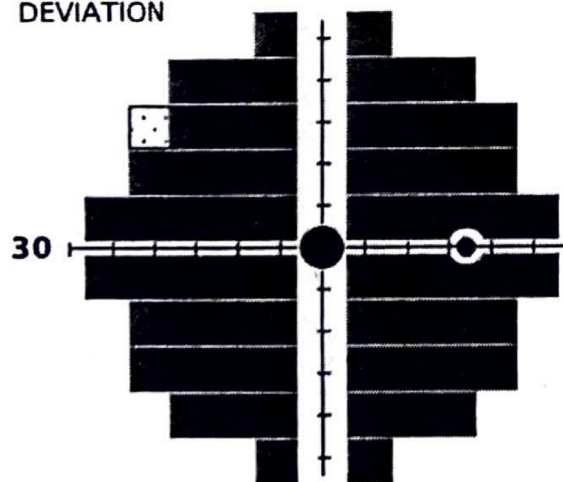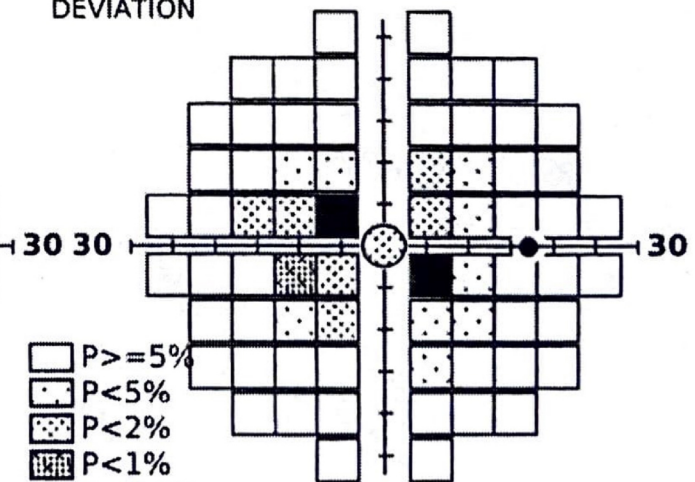

□ P>=5%  
 □ P<5%  
 □ P<2%  
 □ P<1%  
 □ P<0.5%
