# Supplementary material
Source: publisher site journal article supplement (https://www.dovepress.com/article/391001)
Supplement: Supplementary file 3 [file 09_Nov_2022_ID-391001_Supplemental_figure_4-_NGS_Result.pdf › 09_Nov_2022_ID-391001_Supplemental_figure_4-_NGS_Result.pdf]

Updated Interpretations

| GENE  | VARIANT                   | ZYGOSITY     | PRIOR VARIANT CLASSIFICATION | NEW VARIANT CLASSIFICATION |
|-------|---------------------------|--------------|------------------------------|----------------------------|
| USH2A | c.14413G>A (p.Val4805Ile) | heterozygous | Uncertain Significance       | Likely Benign              |

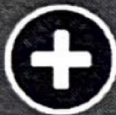

RESULT: POSITIVE

One homozygous Pathogenic variant identified in ABCA4. ABCA4 is associated with autosomal recessive inherited retinal disease.

Additional Variant(s) of Uncertain Significance identified.

| GENE    | VARIANT                   | ZYGOSITY     | VARIANT CLASSIFICATION |
|---------|---------------------------|--------------|------------------------|
| ABCA4   | c.5714+5G>A (Intronic)    | homozygous   | PATHOGENIC             |
| CACNA1F | c.3901A>G (p.Met1301Val)  | heterozygous | Uncertain Significance |
| EYS     | c.2027C>T (p.Thr676Met)   | heterozygous | Uncertain Significance |
| KCNV2   | c.731G>A (p.Arg244His)    | heterozygous | Uncertain Significance |
| KLHL7   | c.1372A>C (p.Thr458Pro)   | heterozygous | Uncertain Significance |
| MKKS    | c.1161+3A>G (Intronic)    | heterozygous | Uncertain Significance |
| USH2A   | c.14531C>T (p.Thr4844Met) | heterozygous | Uncertain Significance |
