# Supplementary material
Source: publisher site journal article supplement (https://www.dovepress.com/article/391001)

## 1 - Rod Response

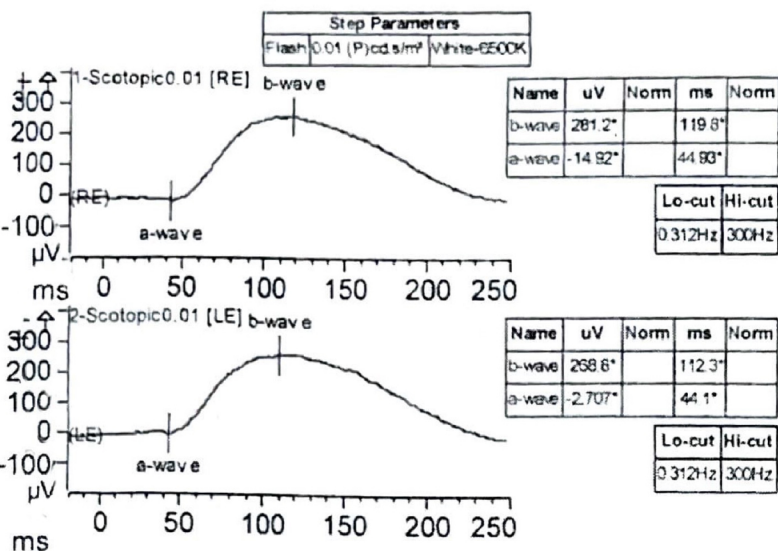

## 2 - Combined Rod-Cone Response

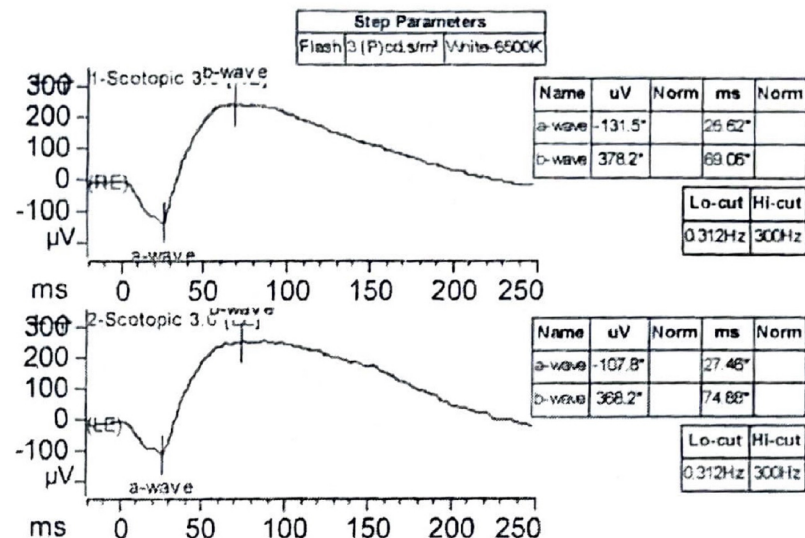

## 3 - High Intensity Rod-Cone

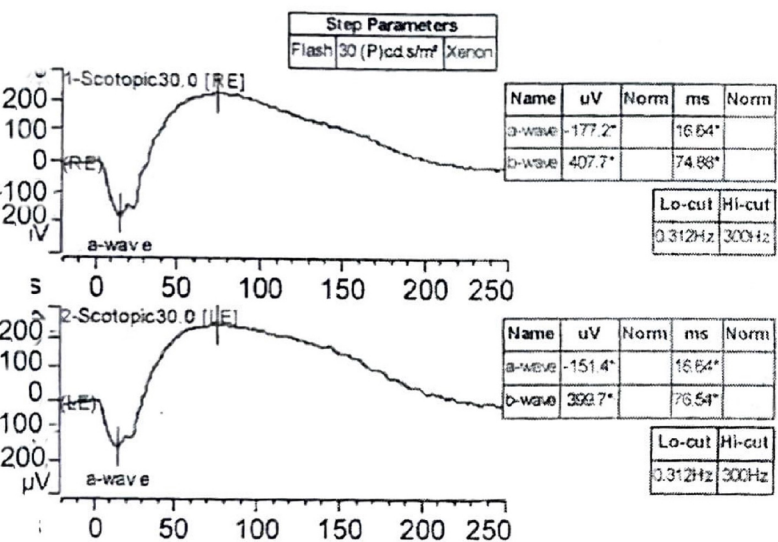

## 4 - Oscillatory Potential

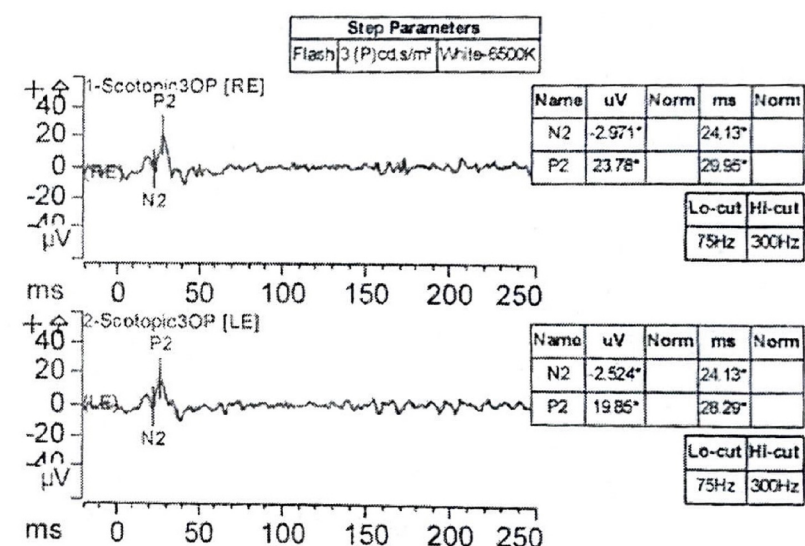

## 5 - Single-flash Cone Response

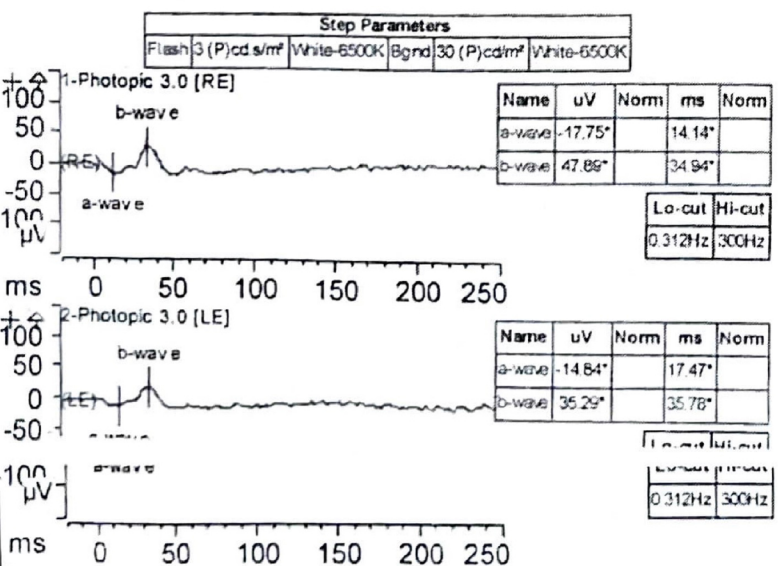

## 6 - 30 Hz Flicker

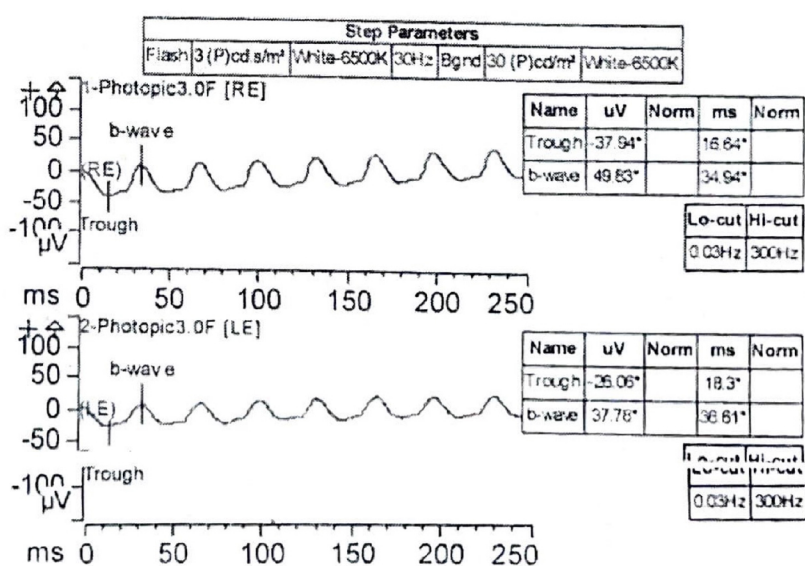

Supplement: Supplementary file 4 [file 09_Nov_2022_ID-_391001_Supplemental_figure_3-_ERG_Both_Eyes_.pdf › 09_Nov_2022_ID-_391001_Supplemental_figure_3-_ERG_Both_Eyes_.pdf]
